# Supplementary material for: vcf2gwas : Python API for comprehensive GWAS analysis using GEMMA
Source: Oxford University Press journal article supplement (doi:10.1093/bioinformatics/btab710), 2021-10-08
Supplement: btab710_supplementary_data.pdf [file btab710_supplementary_data.pdf]

## Supplementary Figures

### List of Supplementary Figures

- 1 Q-Q plot produced by *vcf2gwas* on association analysis performed on the *avrRpm1* recognition in *Arabidopsis thaliana* using the linear mixed model. . . . . 2
- 2 *vcf2gwas* runtime as a function of different level of linkage disequilibrium (LD)-based pruning of the original 1001 Genomes SNP dataset. As in Figure S 1, the *avrRpm1* phenotype and the linear mixed model were used for all runs. . . . . 2
- 3 Number of significant SNPs as a function of SNPs retained by different LD-pruning thresholds. As in Figure S 1, the *avrRpm1* phenotype and the linear mixed model were used for all runs. . . . . 5

## Supplementary Tables

### List of Supplementary Tables

- 1 List of *vcf2gwas*'s most important features, listed separately by the main phases of a GWAS. An extensive list of every command-line option is available in the manual (<https://github.com/frankvogt/vcf2gwas/blob/main/MANUAL.md>). . . . . 3
- 2 List of features and characteristics of *vcf2gwas* compared to two often used GWAS pipelines, *Hail* (<https://hail.is/>) and *easyGWAS* (<https://easygwas.ethz.ch/>). More information on the dataset used to compare the runtime can be found at <https://github.com/frankvogt/vcf2gwas/tree/main/files/Comparison> . . . . . 4
- 3 List of SNPs above the significance threshold ( $-\log_{10}(10^{-7})$ ) (using the same dataset as in Figure 1 and Figure S 1) and their distance from a given gene set (here, *Arabidopsis thaliana* immune system genes containing NBS-LRR domain) produced by *vcf2gwas*, indicating possible relevance of certain genes to the analyzed phenotype for which association analysis was performed. . . . . 6

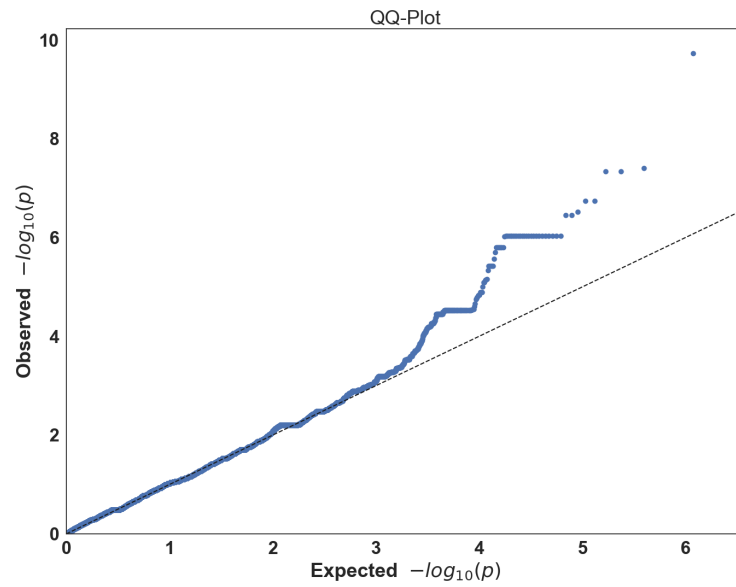

**Figure S 1:** Q-Q plot produced by *vcf2gwas* on association analysis performed on the *avrRpm1* recognition in *Arabidopsis thaliana* using the linear mixed model.

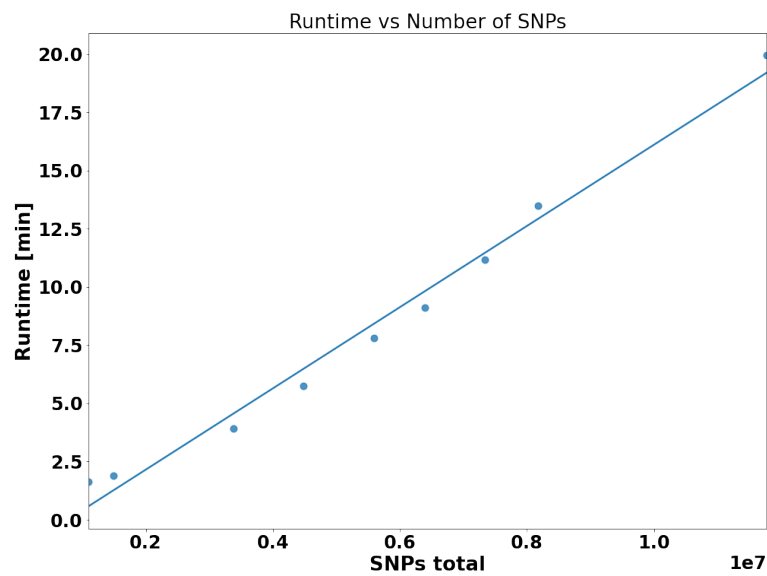

**Figure S 2:** *vcf2gwas* runtime as a function of different level of linkage disequilibrium (LD)-based pruning of the original 1001 Genomes SNP dataset. As in Figure S 1, the *avrRpm1* phenotype and the linear mixed model were used for all runs.

| Area                | Main features                                                                                                                                                                                                                                                                                                                                                                                                                                                                                                                                                                                                     |
|---------------------|-------------------------------------------------------------------------------------------------------------------------------------------------------------------------------------------------------------------------------------------------------------------------------------------------------------------------------------------------------------------------------------------------------------------------------------------------------------------------------------------------------------------------------------------------------------------------------------------------------------------|
| Installation        | Installation via Conda, dependencies (bcftools, plink, and GEMMA) are installed automatically                                                                                                                                                                                                                                                                                                                                                                                                                                                                                                                     |
| Input files         | No pre-formatting for VCF file required, CSV file for phenotypes/covariates,                                                                                                                                                                                                                                                                                                                                                                                                                                                                                                                                      |
| File preparations   | Individuals in all files are adjusted & ordered, correctly formatted for GEMMA analysis                                                                                                                                                                                                                                                                                                                                                                                                                                                                                                                           |
| Analysis            | Full access to GEMMA's algorithms (LM, LMM, mvLMM, BSLMM)                                                                                                                                                                                                                                                                                                                                                                                                                                                                                                                                                         |
| Output              | <ul style="list-style-type: none"> <li>• Quality control plots for phenotype and genotype data</li> <li>• Q-Q plots, Manhattan plots, diagnostic plots for BSLMM, SNP output tables</li> </ul>                                                                                                                                                                                                                                                                                                                                                                                                                    |
| Summary             | <ul style="list-style-type: none"> <li>• Summary tables (especially useful when analyzing multiple phenotypes)</li> <li>• Comparing top SNPs to genes of interest (gene files of common species built-in or via GFF/CSV input file)</li> </ul>                                                                                                                                                                                                                                                                                                                                                                    |
| Additional features | <ul style="list-style-type: none"> <li>• Analysis of synthetic phenotypes using dimensionality reduction via PCA or UMAP</li> <li>• Principal components (PCs) of genotype data can be extracted &amp; used as covariates</li> <li>• PCs of genotype data can be used instead of GEMMA's standard relatedness matrix</li> <li>• Efficiency due to parallelization when analyzing multiple phenotypes from one or more phenotype files at the same time</li> <li>• Analysis and outputs customizable with various additional options</li> <li>• Results saved in clear hierarchical directory structure</li> </ul> |

**Table S 1:** List of *vcf2gwas*'s most important features, listed separately by the main phases of a GWAS. An extensive list of every command-line option is available in the manual (<https://github.com/frankvogt/vcf2gwas/blob/main/MANUAL.md>).

|                                                          | <b>vcf2gwas</b>               | <b>Hail</b>                             | <b>easyGWAS</b>                           |
|----------------------------------------------------------|-------------------------------|-----------------------------------------|-------------------------------------------|
| Platforms                                                | macOS, Linux                  | macOS, Linux                            | online (web-based)                        |
| Installation                                             | via Conda                     | via pip                                 | no installation necessary                 |
| Usage                                                    | Command line                  | Jupyter notebook based                  | web-based interface                       |
| Genotype input format                                    | VCF                           | VCF, PLINK BED, PLINK FAM etc.          | PLINK PED                                 |
| Phenotype input format                                   | CSV                           | CSV/TSV, JSON, FAM etc.                 | TSV (PLINK format)                        |
| Pre-formatting required (from vcf file)                  | No                            | Yes                                     | Yes                                       |
| Plots                                                    | Yes                           | Yes                                     | Yes                                       |
| Plots saved                                              | by default                    | manually                                | downloadable                              |
| Summary files saved                                      | by default                    | manually                                | downloadable                              |
| Quality control                                          | Yes                           | Yes                                     | Yes                                       |
| Filtering (minor allele frequency)                       | Yes                           | Yes                                     | Yes                                       |
| Comparison to genes of interest                          | Yes                           | Yes                                     | Yes                                       |
| Genotype dimension reduction                             | Yes (PCA)                     | Yes (PCA)                               | Yes (PCA)                                 |
| Phenotype dimension reduction                            | Yes (PCA, UMAP)               | No                                      | No                                        |
| Phenotypes per analysis                                  | arbitrary                     | arbitrary                               | maximum 5                                 |
| Parallel analysis of multiple phenotypes                 | Yes                           | Yes                                     | No (separate analysis for each phenotype) |
| Algorithm                                                | GEMMA (LM, LMM, mvLMM, BSLMM) | LMM, linear/logistic/poisson regression | EMMAX, linear regression, FaSTLMM         |
| Runtime (~12,000 SNPs, 19 chromosomes, 1940 individuals) | ~5 min                        | ~30 s                                   | ~3 min                                    |

**Table S 2:** List of features and characteristics of *vcf2gwas* compared to two often used GWAS pipelines, *Hail* (<https://hail.is/>) and *easyGWAS* (<https://easygwas.ethz.ch/>). More information on the dataset used to compare the runtime can be found at <https://github.com/frankvogt/vcf2gwas/tree/main/files/Comparison>

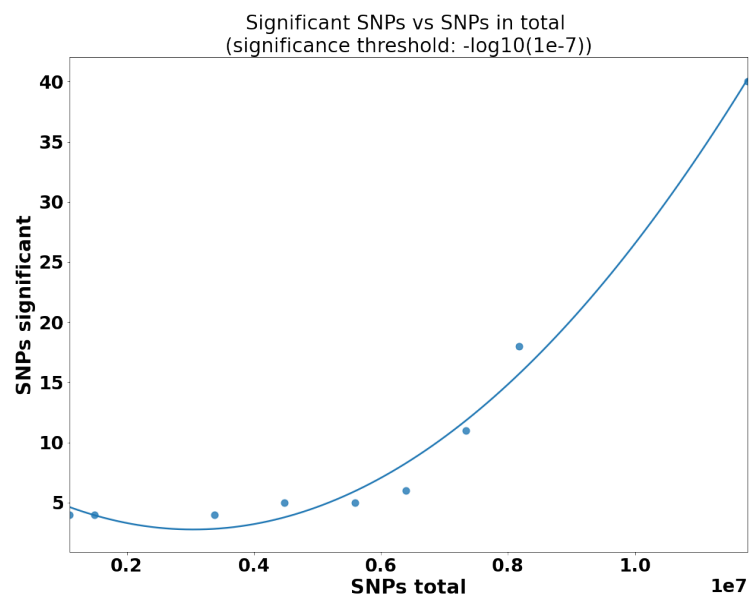

**Figure S 3:** Number of significant SNPs as a function of SNPs retained by different LD-pruning thresholds. As in Figure S 1, the *avrRpm1* phenotype and the linear mixed model were used for all runs.

The threshold to distinguish significant SNPs is  $-\log_{10}(10^{-7})$ .

| SNP ID     | Chr | Phenotype | Upstream gene |                                                         |      |          | Downstream gene |          |                                                         |                                                       |             |
|------------|-----|-----------|---------------|---------------------------------------------------------|------|----------|-----------------|----------|---------------------------------------------------------|-------------------------------------------------------|-------------|
|            |     |           | ID            | Comment                                                 | Name | Distance | SNP position    | Distance | Name                                                    | Comment                                               | ID          |
| 3:2237364  | 3   | avrRpm    | AT3G07040.1   | NB-ARC domain-containing disease resistance protein     | RPM1 | 8340     | 2237364         |          |                                                         |                                                       |             |
| 3:2237394  | 3   | avrRpm    | AT3G07040.1   | NB-ARC domain-containing disease resistance protein     | RPM1 | 8370     | 2237394         |          |                                                         |                                                       |             |
| 3:2237446  | 3   | avrRpm    | AT3G07040.1   | NB-ARC domain-containing disease resistance protein     | RPM1 | 8422     | 2237446         |          |                                                         |                                                       |             |
| 3:2237452  | 3   | avrRpm    | AT3G07040.1   | NB-ARC domain-containing disease resistance protein     | RPM1 | 8428     | 2237452         |          |                                                         |                                                       |             |
| 3:2289171  | 3   | avrRpm    | AT3G07040.1   | NB-ARC domain-containing disease resistance protein     | RPM1 | 60147    | 2289171         |          |                                                         |                                                       |             |
| 2:975138   | 2   | avrRpm    | AT2G03030.1   | Toll-Interleukin-Resistance (TIR) domain family protein |      | 84618    | 975138          | 28330    | Toll-Interleukin-Resistance (TIR) domain family protein |                                                       | AT2G03300.1 |
| 2:975234   | 2   | avrRpm    | AT2G03030.1   | Toll-Interleukin-Resistance (TIR) domain family protein |      | 84714    | 975234          | 28234    | Toll-Interleukin-Resistance (TIR) domain family protein |                                                       | AT2G03300.1 |
| 2:975320   | 2   | avrRpm    | AT2G03030.1   | Toll-Interleukin-Resistance (TIR) domain family protein |      | 84800    | 975320          | 28148    | Toll-Interleukin-Resistance (TIR) domain family protein |                                                       | AT2G03300.1 |
| 2:975405   | 2   | avrRpm    | AT2G03030.1   | Toll-Interleukin-Resistance (TIR) domain family protein |      | 84885    | 975405          | 28063    | Toll-Interleukin-Resistance (TIR) domain family protein |                                                       | AT2G03300.1 |
| 2:975411   | 2   | avrRpm    | AT2G03030.1   | Toll-Interleukin-Resistance (TIR) domain family protein |      | 84891    | 975411          | 28057    | Toll-Interleukin-Resistance (TIR) domain family protein |                                                       | AT2G03300.1 |
| 2:975490   | 2   | avrRpm    | AT2G03030.1   | Toll-Interleukin-Resistance (TIR) domain family protein |      | 84970    | 975490          | 27978    | Toll-Interleukin-Resistance (TIR) domain family protein |                                                       | AT2G03300.1 |
| 2:975590   | 2   | avrRpm    | AT2G03030.1   | Toll-Interleukin-Resistance (TIR) domain family protein |      | 85070    | 975590          | 27878    | Toll-Interleukin-Resistance (TIR) domain family protein |                                                       | AT2G03300.1 |
| 1:11273854 | 1   | avrRpm    |               |                                                         |      |          | 11273854        | 14598    | RAC1                                                    | Disease resistance protein (TIR-NBS-LRR class) family | AT1G31540.2 |
| 1:11273813 | 1   | avrRpm    |               |                                                         |      |          | 11273813        | 14639    | RAC1                                                    | Disease resistance protein (TIR-NBS-LRR class) family | AT1G31540.2 |
| 3:2165688  | 3   | avrRpm    |               |                                                         |      |          | 2165688         | 60264    | RPM1                                                    | NB-ARC domain-containing disease resistance protein   | AT3G07040.1 |

**Table S 3:** List of SNPs above the significance threshold ( $-\log_{10}(10^{-7})$ ) (using the same dataset as in Figure 1 and Figure S 1) and their distance from a given gene set (here, *Arabidopsis thaliana* immune system genes containing NBS-LRR domain) produced by *vcf2gwas*, indicating possible relevance of certain genes to the analyzed phenotype for which association analysis was performed.
